# Supplementary material for: Digital versatile discs as platforms for multiplexed genotyping based on selective ligation and universal microarray detection
Source: Royal Society of Chemistry journal article supplement (doi:10.1039/c8an01830h), 2018-11-19
Supplement: c8an01830h2.xlsx [file c8an01830h2.xlsx]

## Sheet: Oligonucleotides
	Gen	rs	LPO-A	LPO-B	RPO	Probe	barcode	L1	L2	L3	L4	Tm (ºC)		Allele A	Allele B
1	ABCB1	rs2235048	ACTTCGTCAGTAACGGAC-G-TGCTAATTTCTCTTCACTTCTGGGAA	GAGTCGAGGTCATATCGT-G-TGCTAATTTCTCTTCACTTCTGGGAG	[P]-ACCAGCCCCTTATAAATCAAACTA-AGGCGATAGGCTGTACGAATCG-GTCTGCCTATAGTGAGTC	[BtnTg]TTTTTTTTTT-CGATTCGTACAGCCTATCGCCT	AGGCGATAGGCTGTACGAATCG	26	24	22	22	65.9		A	G
2	ANKK1	rs1800497	ACTTCGTCAGTAACGGAC-GCAGCTGGGCGCCTGCCTT	GAGTCGAGGTCATATCGT-GCAGCTGGGCGCCTGCCTC	[P]-GACCAGCACTTTGAGGATGG-GTGGGCCTACGAGAAGATCGCT-GTCTGCCTATAGTGAGTC	[BtnTg]TTTTTTTTTT-AGCGATCTTCTCGTAGGCCCAC	GTGGGCCTACGAGAAGATCGCT	19	20	22	22	64		T	C
3	CACNG2	rs2284017	ACTTCGTCAGTAACGGAC-GAGACCATCGCTCAATGAAGTCACTT	GAGTCGAGGTCATATCGT-GAGACCATCGCTCAATGAAGTCACTC	[P]-AGCTATTCAAAACATGTTCAGC-GCTTGACCTAACCGATCCGAAC-GTCTGCCTATAGTGAGTC	[BtnTg]TTTTTTTTTT-GTTCGGATCGGTTAGGTCAAGC	GCTTGACCTAACCGATCCGAAC	26	22	22	22	64		T	C
4	COMT	rs4680	ACTTCGTCAGTAACGGAC-G-ATGGTGGATTTCGCTGGCA	GAGTCGAGGTCATATCGT-G-ATGGTGGATTTCGCTGGCG	[P]-TGAAGGACAAGGTGTGCATG-ATCACACGCAGTCGGCTGTCTT-GTCTGCCTATAGTGAGTC	[BtnTg]TTTTTTTTTT-AAGACAGCCGACTGCGTGTGAT	ATCACACGCAGTCGGCTGTCTT	19	20	22	22	64		A	G
5	CYP1A2	rs762551	ACTTCGTCAGTAACGGAC-G-CAAAGGGTGAGCTCTGTGGGCA	GAGTCGAGGTCATATCGT-G-CAAAGGGTGAGCTCTGTGGGCC	[P]-CAGGACGCATGGTAGATGGAG-TAGAGTCCCGATCCTAGTGGCT-GTCTGCCTATAGTGAGTC	[BtnTg]TTTTTTTTTT-AGCCACTAGGATCGGGACTCTA	TAGAGTCCCGATCCTAGTGGCT	22	21	22	22	64		A	C
6	CYP2C19*17	rs12248560	ACTTCGTCAGTAACGGAC-GTCAAATTTGTGTCTTCTGTTCTCAAAGT	GAGTCGAGGTCATATCGT-GTCAAATTTGTGTCTTCTGTTCTCAAAGC	[P]-ATCTCTGATGTAAGAGATAATGCG-GGCCAATGTTCGTAGTGACCCA-GTCTGCCTATAGTGAGTC	[BtnTg]TTTTTTTTTT-TGGGTCACTACGAACATTGGCC	GGCCAATGTTCGTAGTGACCCA	29	24	22	22	64		T	C
7	CYP2C19*3	rs4986893	ACTTCGTCAGTAACGGAC-TCAGGATTGTAAGCACCCCCTGA	GAGTCGAGGTCATATCGT-TCAGGATTGTAAGCACCCCCTGG	[P]-ATCCAGGTAAGGCCAAGTTTTTT-GCGATTCATAGACCCGTTTCCG-GTCTGCCTATAGTGAGTC	[BtnTg]TTTTTTTTTT-CGGAAACGGGTCTATGAATCGC	GCGATTCATAGACCCGTTTCCG	23	23	22	22	64		A	G
8	CYP2C9*2	rs1799853	ACTTCGTCAGTAACGGAC-CGGGCTTCCTCTTGAACACA	GAGTCGAGGTCATATCGT-CGGGCTTCCTCTTGAACACG	[P]-GTCCTCAATGCTCCTCTTCCC-CGTTCTAGCCTAACCGCCTTGA-GTCTGCCTATAGTGAGTC	[BtnTg]TTTTTTTTTT-TCAAGGCGGTTAGGCTAGAACG	CGTTCTAGCCTAACCGCCTTGA	20	21	22	22	65.9		A	G
9	CYP2C9*3	rs1057910	ACTTCGTCAGTAACGGAC-GCTGGTGGGGAGAAGGTCAAT	GAGTCGAGGTCATATCGT-GCTGGTGGGGAGAAGGTCAAG	[P]-GTATCTCTGGACCTCGTGCAC-ACGGTTGACGACTGCGACCCAT-GTCTGCCTATAGTGAGTC	[BtnTg]TTTTTTTTTT-ATGGGTCGCAGTCGTCAACCGT	ACGGTTGACGACTGCGACCCAT	21	21	22	22	64		T	G
10	CYP2D6	rs16947	ACTTCGTCAGTAACGGAC-GAACAGGTCAGCCACCACTATGCA	GAGTCGAGGTCATATCGT-GAACAGGTCAGCCACCACTATGCG	[P]-CAGGTTCTCATCATTGAAGCTG-CGTAAGGTGGCGTGACGACTAA-GTCTGCCTATAGTGAGTC	[BtnTg]TTTTTTTTTT-TTAGTCGTCACGCCACCTTACG	CGTAAGGTGGCGTGACGACTAA	24	22	22	22	65.9		A	G
11	CYP2D6	rs1135840	ACTTCGTCAGTAACGGAC-GACAAAGCTCATAGGGGGATGGGG	GAGTCGAGGTCATATCGT-GACAAAGCTCATAGGGGGATGGGC	[P]-TCACCAGGAAAGCAAAGACAC-ACGTAGCCTGTCCGTGACGAGA-GTCTGCCTATAGTGAGTC	[BtnTg]TTTTTTTTTT-TCTCGTCACGGACAGGCTACGT	ACGTAGCCTGTCCGTGACGAGA	24	21	22	22	64		G	C
12	CYP2D6*41/69	rs28371725	ACTTCGTCAGTAACGGAC-GCCCCCGCCTGTACCCTTT	GAGTCGAGGTCATATCGT-GCCCCCGCCTGTACCCTTC	[P]-CTCCCTCGGCCCCTGCACTG-TATCGTTTGGAGGCGGTCAACC-GTCTGCCTATAGTGAGTC	[BtnTg]TTTTTTTTTT-GGTTGACCGCCTCCAAACGATA	TATCGTTTGGAGGCGGTCAACC	19	20	22	22	65.9		T	C
13	DRD2	rs6277	ACTTCGTCAGTAACGGAC-CTGGTTTGGCGGGGCTGTCA	GAGTCGAGGTCATATCGT-GCTGGTTTGGCGGGGCTGTCG	[P]-GGAGTGCTGTGGAGACCAT-TGTAGCCCTACGCGACGGTTGA-GTCTGCCTATAGTGAGTC	[BtnTg]TTTTTTTTTT-TCAACCGTCGCGTAGGGCTACA	TGTAGCCCTACGCGACGGTTGA	20	19	22	22	64		A	G
14	DRD3	rs963468	ACTTCGTCAGTAACGGAC-G-ACACCATGCTCTGCTGTATCAGGA	GAGTCGAGGTCATATCGT-G-ACACCATGCTCTGCTGTATCAGGG	[P]-TCTGTTGATGATGTGATATTTGC-ACGGTACTGCCTGTCGCATAGA-GTCTGCCTATAGTGAGTC	[BtnTg]TTTTTTTTTT-TCTATGCGACAGGCAGTACCGT	ACGGTACTGCCTGTCGCATAGA	24	23	22	22	64		A	G
15	DRD4	rs11246226	ACTTCGTCAGTAACGGAC-GCTTGCTGTGGGGCTTGGGT	GAGTCGAGGTCATATCGT-GCTTGCTGTGGGGCTTGGGG	[P]-CATCCTCTGGCCAGGGACT-ATAGCAGGTTACGGTCGGACGA-GTCTGCCTATAGTGAGTC	[BtnTg]TTTTTTTTTT-TCGTCCGACCGTAACCTGCTAT	ATAGCAGGTTACGGTCGGACGA	20	19	22	22	65.9		T	G
16	GNB3	rs5443	ACTTCGTCAGTAACGGAC-GATCATCTGCGGCATCACGTCT	GAGTCGAGGTCATATCGT-GATCATCTGCGGCATCACGTCC	[P]-GTGGCCTTCTCCCTCAGT-ACGGTCCACTACTCGATGCGCT-GTCTGCCTATAGTGAGTC	[BtnTg]TTTTTTTTTT-AGCGCATCGAGTAGTGGACCGT	ACGGTCCACTACTCGATGCGCT	22	18	22	22	65.9		T	C
17	GRIA3	rs4825476	ACTTCGTCAGTAACGGAC-G-CCCACCTCTGAGCAGGTTTTAGAA	GAGTCGAGGTCATATCGT-G-CCCACCTCTGAGCAGGTTTTAGAG	[P]-TTTCATATCAGATGCCCAGG-GTCACATACCGTGAGCCGCCTA-GTCTGCCTATAGTGAGTC	[BtnTg]TTTTTTTTTT-TAGGCGGCTCACGGTATGTGAC	GTCACATACCGTGAGCCGCCTA	24	20	22	22	65.9		A	G
18	GRIK2	rs2518224	ACTTCGTCAGTAACGGAC-GTCCTCGTGAAGAACTCATTTATCCACA	GAGTCGAGGTCATATCGT-GTCCTCGTGAAGAACTCATTTATCCACC	[P]-TGGAGTAGGTATTACCATGT-CAAAGACCGAATGACCAGCGGCTTTG-GTCTGCCTATAGTGAGTC	[BtnTg]TTTTTTTTTT-CAAAGCCGCTGGTCATTCGGTC	GACCGAATGACCAGCGGCTTTG	28	20	22	22	64		A	C
19	GSK3B	rs2319398	ACTTCGTCAGTAACGGAC-G-AATCTTTTTGTCTCCACAATCTGTCTA	GAGTCGAGGTCATATCGT-G-AATCTTTTTGTCTCCACAATCTGTCTC	[P]-TTCTGGACATTTAATATAAATAGAATGG-TTCTGATCGCGGCGAGAGCTAA-GTCTGCCTATAGTGAGTC	[BtnTg]TTTTTTTTTT-TTAGCTCTCGCCGCGATCAGAA	TTCTGATCGCGGCGAGAGCTAA	27	28	22	22	64		A	C
20	GSK3B	rs13321783	ACTTCGTCAGTAACGGAC-CATCACAAGCCAAGATTTCCTTCAT	GAGTCGAGGTCATATCGT-CATCACAAGCCAAGATTTCCTTCAC	[P]-ACTGTCTTAATATCTTATACATCAAATA-GATCTGCCGACTATTCTCGCAC-GTCTGCCTATAGTGAGTC	[BtnTg]TTTTTTTTTT-GTGCGAGAATAGTCGGCAGATC	GATCTGCCGACTATTCTCGCAC	25	28	22	22	65.9		T	C
21	HTR1A	rs10042486	ACTTCGTCAGTAACGGAC-GTGTTTGTCCATTATCCCCAAACTAT	GAGTCGAGGTCATATCGT-TGTTTGTCCATTATCCCCAAACTAC	[P]-GGCTGAATTGTTTTTATTACTGAAG-AGCCGGTGCTGTCGCCAATTAC-GTCTGCCTATAGTGAGTC	[BtnTg]TTTTTTTTTT-GTAATTGGCGACAGCACCGGCT	AGCCGGTGCTGTCGCCAATTAC	26	25	22	22	64		T	C
22	HTR2A	rs6313	ACTTCGTCAGTAACGGAC-G-TGCATCAGAAGTGTTAGCTTCTCCA	GAGTCGAGGTCATATCGT-G-TGCATCAGAAGTGTTAGCTTCTCCG	[P]-GAGTTAAAGTCATTACTGTAGAGCCT-ACCATGCGTAGGTATCGGGCTA-GTCTGCCTATAGTGAGTC	[BtnTg]TTTTTTTTTT-TAGCCCGATACCTACGCATGGT	ACCATGCGTAGGTATCGGGCTA	25	26	22	22	65.9		A	G
23	LOC729622	rs4675690	ACTTCGTCAGTAACGGAC-TGTTAGATGCTGAAACACAAAAAAAGAAT	GAGTCGAGGTCATATCGT-TGTTAGATGCTGAAACACAAAAAAAGAAC	[P]-GAAACAGAACAGATCAGACAAAAA-TCTCGACAGTGCGATTACCGGC-GTCTGCCTATAGTGAGTC	[BtnTg]TTTTTTTTTT-GCCGGTAATCGCACTGTCGAGA	TCTCGACAGTGCGATTACCGGC	29	24	22	22	67.7		T	C
24	LPHN3	rs6551665	ACTTCGTCAGTAACGGAC-G-ATATTTTTGTCACAATGAGAGGTA	GAGTCGAGGTCATATCGT-G-ATATTTTTGTCACAATGAGAGGTG	[P]-GTGAGTGCTACTGGCATCTAG-AGTCGAAGTGGGCGGCGTCAGA-GTCTGCCTATAGTGAGTC	[BtnTg]TTTTTTTTTT-TCTGACGCCGCCCACTTCGACT	AGTCGAAGTGGGCGGCGTCAGA	24	21	22	22	64		A	G
25	LPHN3	rs2345039	ACTTCGTCAGTAACGGAC-GTGATTTCCTTTTTCTCACACCCTTCTC	GAGTCGAGGTCATATCGT-GTGATTTCCTTTTTCTCACACCCTTCTG	[P]-CTCTGATCTCCTACCTCTTTCC-AATGTTGACCCGGATCTCGTCC-GTCTGCCTATAGTGAGTC	[BtnTg]TTTTTTTTTT-GGACGAGATCCGGGTCAACATT	AATGTTGACCCGGATCTCGTCC	28	22	22	22	65.9		C	G
26	NR3C1	rs852977	ACTTCGTCAGTAACGGAC-GCCACTTTCTTGTAAATGTTATAAAAACTGT	GAGTCGAGGTCATATCGT-GCCACTTTCTTGTAAATGTTATAAAAACTGC	[P]-AGAGATTAACTAAAAAATGCACACA-CTAGAACGTCAGACCGGCTTGC-GTCTGCCTATAGTGAGTC	[BtnTg]TTTTTTTTTT-GCAAGCCGGTCTGACGTTCTAG	CTAGAACGTCAGACCGGCTTGC	31	25	22	22	64		T	C
27	NR3C1	rs10482633	ACTTCGTCAGTAACGGAC-AAATCTGTCCTTTAAATTTTCATGGAT	GAGTCGAGGTCATATCGT-AAATCTGTCCTTTAAATTTTCATGGAG	[P]-TATCTAGACCATAGCCAAGTCAAG-ATGGTCACCACGCTTTGCACGA-GTCTGCCTATAGTGAGTC	[BtnTg]TTTTTTTTTT-TCGTGCAAAGCGTGGTGACCAT	ATGGTCACCACGCTTTGCACGA	27	24	22	22	67.7		T	G
28	RGS4	rs2661319	ACTTCGTCAGTAACGGAC-G-GCACCACCACACGGAAAGCA	GAGTCGAGGTCATATCGT-G-GCACCACCACACGGAAAGCG	[P]-TAGTGCCTTTCTGATGATGGAGC-CGTAGAGCAACGCGATACCCCC-GTCTGCCTATAGTGAGTC	[BtnTg]TTTTTTTTTT-GGGGGTATCGCGTTGCTCTACG	CGTAGAGCAACGCGATACCCCC	20	23	22	22	67.7		A	G
